# Supplementary material for: Dynamic Changes of the Fungal Microbiome in Alcohol Use Disorder
Source: PubMed Central journal article supplement (PMC8327211; doi:10.3389/fphys.2021.699253), 2021-07-19

# Supplementary Figure 1

A

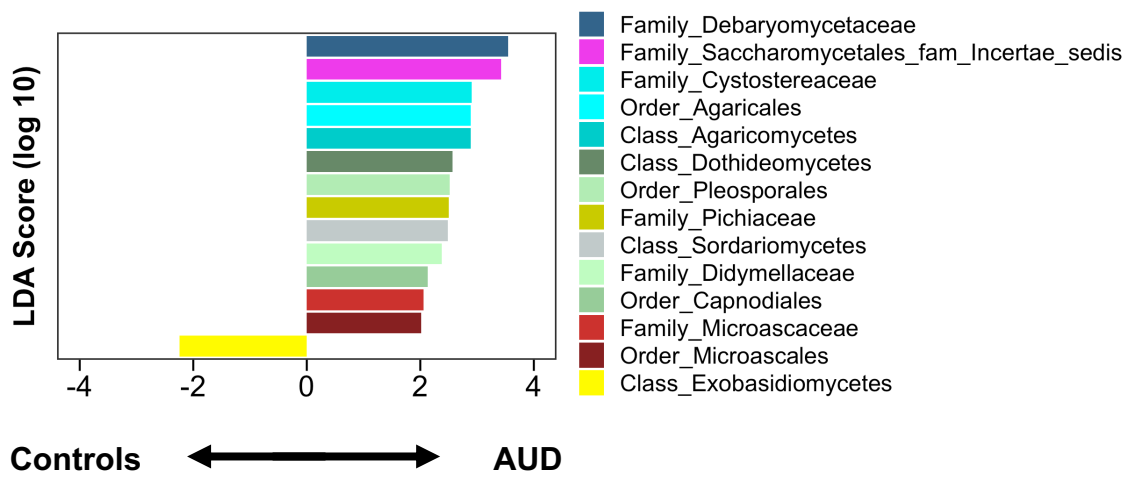

# Supplementary Figure 2

A

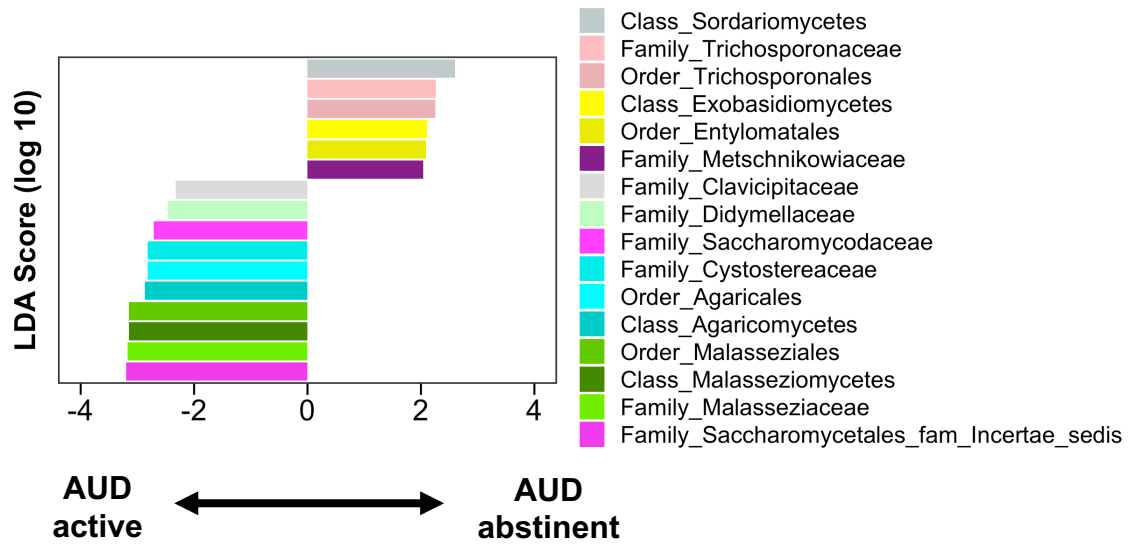

Supplement: Data_Sheet_2.pdf [file Data_Sheet_2.pdf]
